# Supplementary material
Source: MDPI journal article supplement (https://www.mdpi.com/2073-4344/9/7/608)
Supplement: s1 [file s1]

# **Enhanced photocatalytic and antibacterial performance of ZnO nanoparticles prepared by an efficient thermolysis method**

Md. Abu Hanif<sup>1\*</sup>, Insup Lee<sup>1</sup>, Jeasmin Akter<sup>2</sup>, Md. Akherul Islam<sup>1</sup>, A. A. S. Mostofa Zahid<sup>1</sup>,  
Kamal P. Sapkota<sup>1</sup>, Jae R. Hahn<sup>1,3,\*</sup>

<sup>1</sup>*Department of Chemistry and Bioactive Material Sciences, Chonbuk National University, Jeonju 54896, Korea*

<sup>2</sup>*Department of Chemistry, Faculty of Civil Engineering, Khulna University of Engineering & Technology,  
Khulna-9203, Bangladesh*

<sup>3</sup>*Textile Engineering, Chemistry and Science, North Carolina State University 2401 Research Dr. Raleigh, NC  
27695-8301, USA*

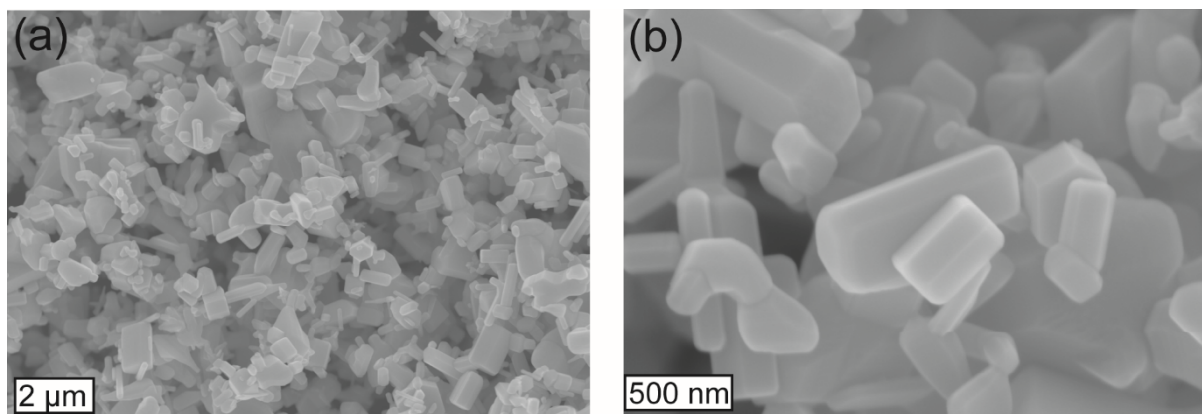

**Figure S1.** (a) and (b) FE-SEM images of the pure ZnO (ACS reagent) at different magnifications.

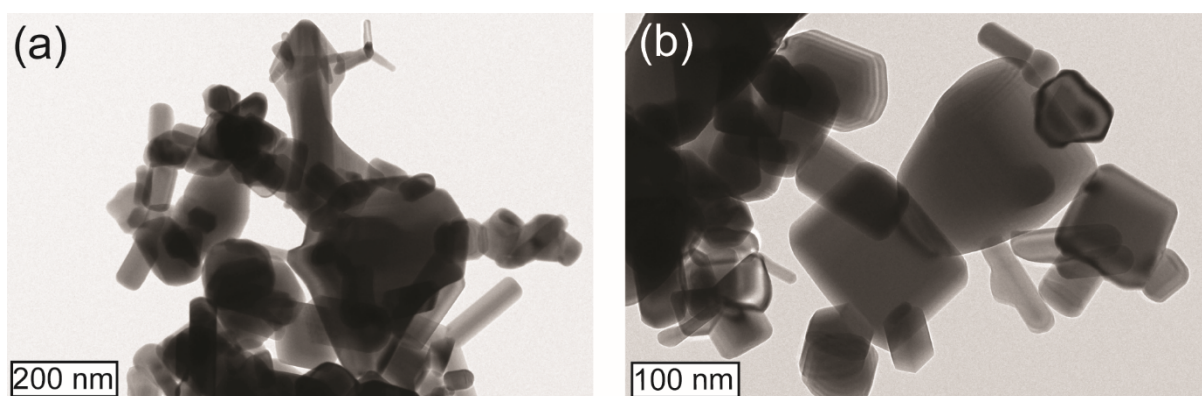

**Figure S2.** (a) and (b) TEM images of the pure ZnO (ACS reagent) at different magnifications.

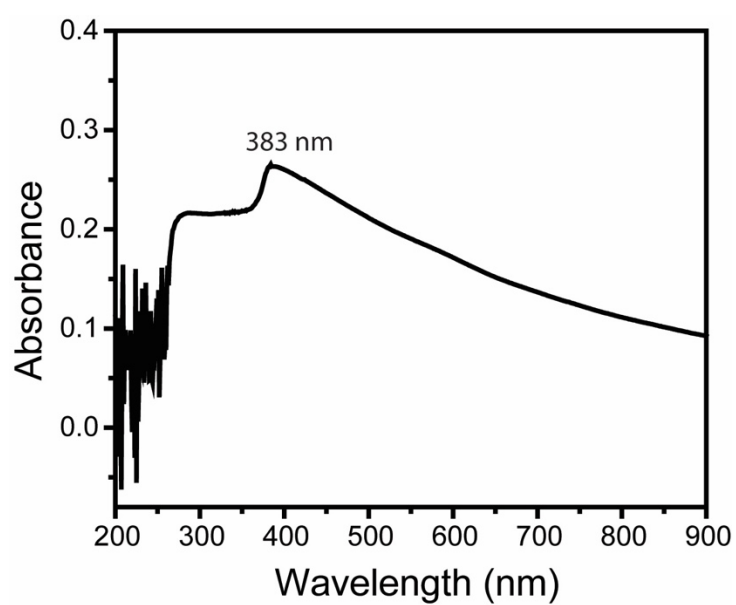

**Figure S3.** UV-vis absorption spectrum of synthesized ZnO-NPs in the range 200-900 nm.

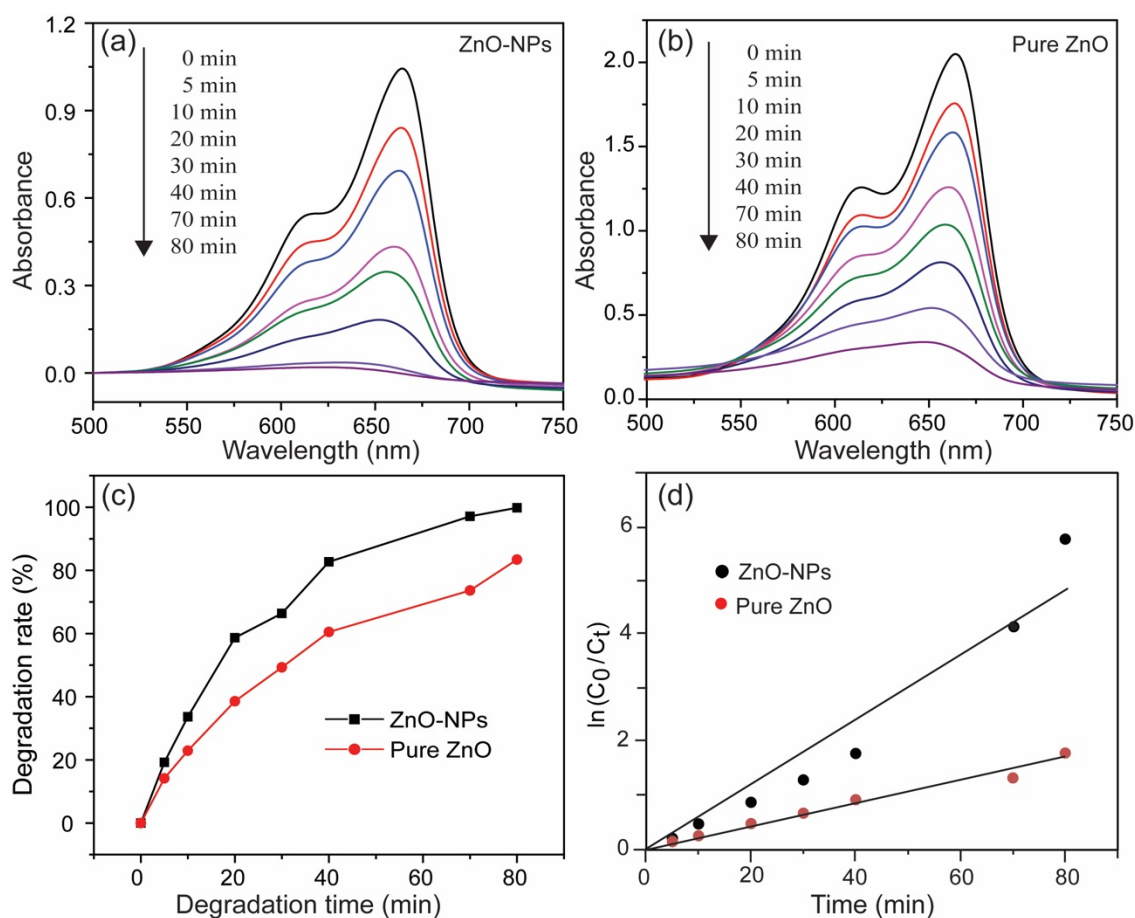

**Figure S4.** UV-vis absorbance spectra showing the decomposition of methylene blue (MB) in the presence of (a) the ZnO-NPs and (b) the pure ZnO (ACS reagent); (c) degradation rates of MB and (d) kinetic plots in presence of the ZnO-NPs or the pure ZnO. The rate constant ( $k$ ) was obtained from the slope of the equation of absorbance vs. time; the calculated value was  $0.0781 (\pm 0.01) \text{ min}^{-1}$  in the presence of the ZnO-NPs and  $0.0224 (\pm 0.01) \text{ min}^{-1}$  in the presence of the pure ZnO, respectively. The decomposition of MB was carried out at  $29^\circ\text{C}$ .

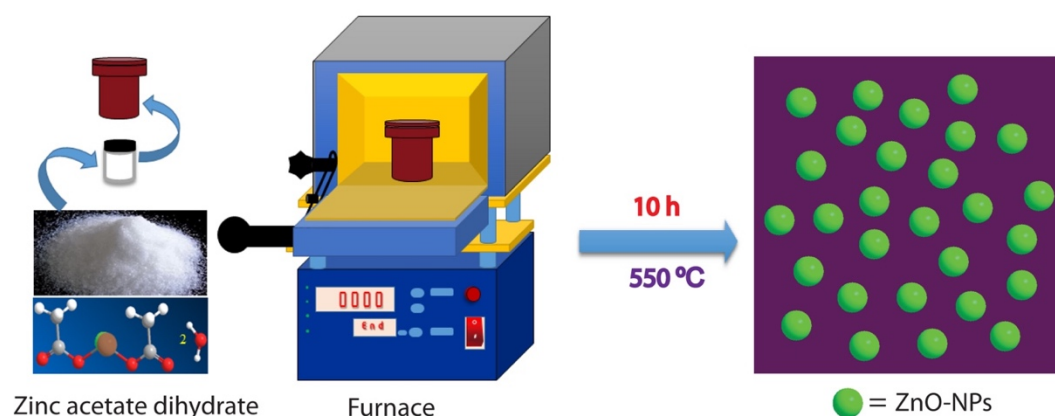

**Figure S5.** Schematic diagram for preparation of ZnO-NPs.
